# Supplementary material for: Metabolomic Approaches to Studying the Response to Drought Stress in Corn (Zea mays) Cobs
Source: MDPI journal article supplement (doi:10.3390/metabo11070438), 2021-07-03
Supplement: s1 [file s1]

## Supplementary Materials:

The link to the RAW data files will be made available prior to publication.

**Figure S1.** Characteristic base peak ion chromatogram for (a) LNE (b) LC and (c) LRT samples obtained using a T3 column coupled to high resolution mass spectrometry (LC-HRMS) to allow the retention and separation of metabolites with a broad range of polarities.

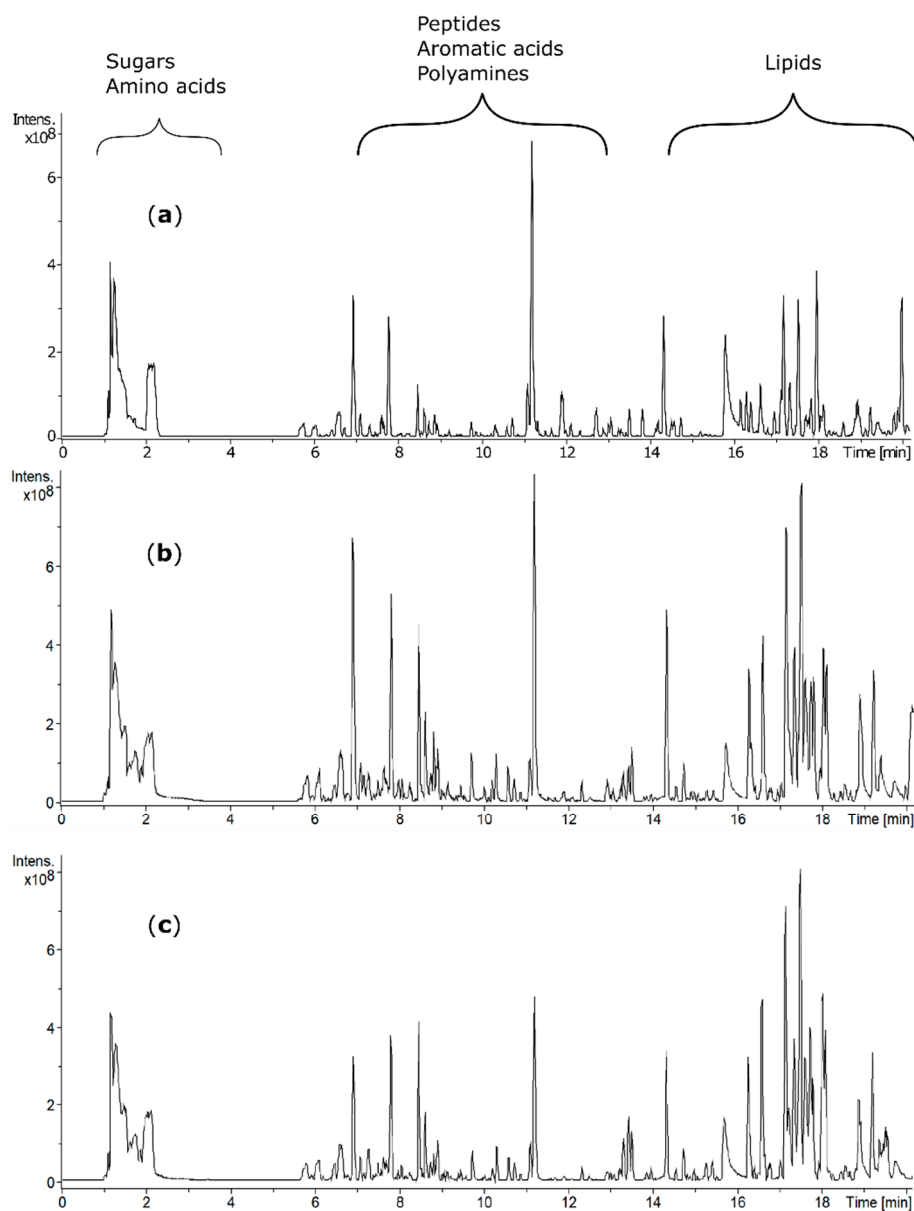

**Figure S2.** Figure showing relative abundances of  $m/z$  features (a) 279.1238 (b) 143.0349 (c) 480.3075 and (d) 520.3398. Blue, yellow and red diamonds represent well-watered, moderate drought and severe drought conditions respectively. ANOVA p-val are indicated.

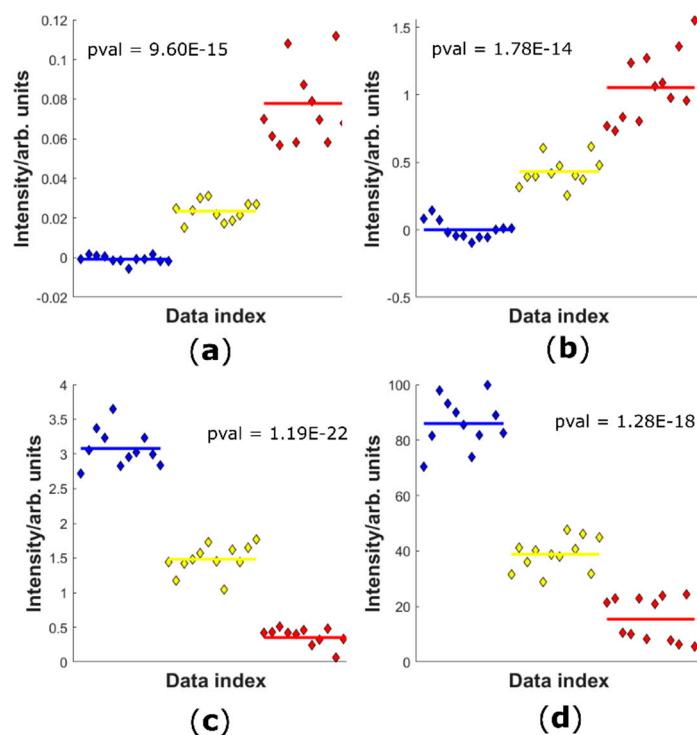

**Table S1.** Table showing the moisture content of the maize used in the extraction condition experiment.

| Sample | Fresh weight (g) | Dry weight (g) | Moisture content (%) |
|--------|------------------|----------------|----------------------|
| B73I   | 1.199            | 0.237          | 80                   |
| B73H   | 1.748            | 0.603          | 66                   |
| B73G   | 1.798            | 0.627          | 65                   |
| B73J   | 1.923            | 0.687          | 64                   |

**Table S2.** Summary of data on all possible drought related biomarkers of maize. Possible identifications were assigned using compound databases (Metlin, LipidBlast, ChemSpider, Progenesis MetaScope \*Indicates the data were scaled. The adjusted ANOVA p-val is quoted.

| Tissue Type | Scan Mode | m/z      | tR            | Molecular Species                   | MF                                                              | ppm   | p-val    | Possible Identification      | Fragmentation Score |
|-------------|-----------|----------|---------------|-------------------------------------|-----------------------------------------------------------------|-------|----------|------------------------------|---------------------|
| K           | N*        | 279.1238 | 9.52          | [M-H] <sup>-</sup>                  | C <sub>15</sub> H <sub>20</sub> O <sub>5</sub>                  | -0.04 | 9.60E-15 | Neophaseic Acid (neoPA)      | 50.1                |
| K           | N*        | 143.0349 | 3.88 and 3.89 | [M-H] <sup>-</sup>                  | C <sub>6</sub> H <sub>8</sub> O <sub>4</sub>                    | 0.3   | 1.78E-14 | Methyl itaconate             | 58.5                |
| K           | N*        | 129.0193 | 2.05          | [M-H <sub>2</sub> O-H] <sup>-</sup> | C <sub>5</sub> H <sub>8</sub> O <sub>5</sub>                    | 0.4   | 6.73E-14 | Citramalic acid              | 29.4                |
| K           | N*        | 345.0827 | 2.8           | [M-H] <sup>-</sup>                  | C <sub>14</sub> H <sub>18</sub> O <sub>10</sub>                 | 0.02  | 3.71E-9  | No fragmentation information | -                   |
| K           | N         | 423.2517 | 21.18         | [M+FA-H] <sup>-</sup>               | C <sub>19</sub> H <sub>39</sub> O <sub>5</sub> P                | 0.05  | 1.25E-10 | No fragmentation information | -                   |
| K           | N         | 447.2516 | 19.95         | [M-H <sub>2</sub> O-H]              | C <sub>22</sub> H <sub>43</sub> O <sub>8</sub> P                | -0.32 | 8.07E-14 | -                            | -                   |
| K           | N         | 375.0570 | 3.88          | [M-H] <sup>-</sup>                  | C <sub>14</sub> H <sub>16</sub> O <sub>12</sub>                 | -0.24 | 1.85E-13 | -                            | -                   |
| K           | N         | 632.2858 | 11.88         | [M-H] <sup>-</sup>                  | C <sub>29</sub> H <sub>48</sub> NO <sub>12</sub> P              | -1.92 | 2.301E-3 | -                            | -                   |
| K           | N         | 735.2141 | 7.19          | [M-H] <sup>-</sup>                  | C <sub>34</sub> H <sub>40</sub> O <sub>18</sub>                 | 0.09  | 3.19E-18 | No fragmentation information | -                   |
| K           | P*        | 480.3075 | 18.87         | [M+H] <sup>+</sup>                  | C <sub>23</sub> H <sub>46</sub> NO <sub>7</sub> P               | -0.21 | 1.19E-22 | PE(18:1/0:0)                 | 55.1                |
| K           | P*        | 260.1700 | 17.77         | [M+2H] <sup>2+</sup>                | C <sub>23</sub> H <sub>46</sub> N <sub>6</sub> O <sub>5</sub> S | -0.5  | 4.86E-18 | No fragmentation information | -                   |
| K           | P         | 520.3398 | 17.75         | [M+H] <sup>+</sup>                  | C <sub>26</sub> H <sub>50</sub> NO <sub>7</sub> P               | -0.1  | 1.28E-18 | PC(18:2/0:0)                 | 88.8                |
| K           | P         | 634.3008 | 11.80         | [M+H] <sup>+</sup>                  | C <sub>36</sub> H <sub>43</sub> NO <sub>9</sub>                 | -0.35 | 4.55E-4  | -                            | -                   |
| K           | P         | 522.3556 | 18.99         | [M+H] <sup>+</sup>                  | C <sub>26</sub> H <sub>52</sub> NO <sub>7</sub> P               | -0.42 | 2.42E-16 | PC(18:1/0:0)                 | 78.4                |
| K           | P         | 478.2929 | 17.66         | [M+H] <sup>+</sup>                  | C <sub>23</sub> H <sub>44</sub> NO <sub>7</sub> P               | -0.26 | 9.06E-16 | No fragmentation information | -                   |

|    |    |          |       |                        |                                                                 |       |          |                                |      |
|----|----|----------|-------|------------------------|-----------------------------------------------------------------|-------|----------|--------------------------------|------|
| K  | P  | 493.2810 | 8.07  | [M+H] <sup>+</sup>     | C <sub>28</sub> H <sub>36</sub> N <sub>4</sub> O <sub>4</sub>   | -0.09 | 2.01E-5  | No fragmentation information   | -    |
| IC | N* | 538.1745 | 8.37  | [M-H] <sup>-</sup>     | C <sub>24</sub> H <sub>25</sub> N <sub>7</sub> O <sub>8</sub>   | 1.0   | 8.46E-26 | -                              | -    |
| IC | N* | 559.1068 | 9.91  | [M-H] <sup>-</sup>     | C <sub>19</sub> H <sub>29</sub> O <sub>17</sub> P               | -0.7  | 1.89E-14 | -                              | -    |
| IC | N* | 491.1194 | 9.89  | [M-H] <sup>-</sup>     | C <sub>23</sub> H <sub>23</sub> O <sub>12</sub>                 | 0.3   | 2.81E-23 | Aurantio-obtusin β-D-glucoside | 35.4 |
| IC | N  | 423.2514 | 21.18 | [M+FA-H] <sup>-</sup>  | C <sub>19</sub> H <sub>39</sub> O <sub>5</sub> P                | -0.04 | 7.29E-16 | No fragment info               | -    |
| IC | N  | 447.2517 | 19.95 | [M-H <sub>2</sub> O-H] | C <sub>22</sub> H <sub>43</sub> O <sub>8</sub> P                | -0.4  | 1.18E-5  | -                              | -    |
| IC | N  | 483.2729 | 19.32 | [M-H] <sup>-</sup>     | C <sub>22</sub> H <sub>45</sub> O <sub>9</sub> P                | -0.91 | 3.04E-14 | -                              | -    |
| IC | N  | 571.2889 | 18.00 | [M+FA-H] <sup>-</sup>  | C <sub>24</sub> H <sub>47</sub> O <sub>10</sub> P               | -0.05 | 8.75E-9  | -                              | -    |
| IC | N  | 540.3305 | 18.51 | [M+FA-H] <sup>-</sup>  | C <sub>24</sub> H <sub>50</sub> NO <sub>7</sub> P               | 0.37  | 1.81E-8  | Lysolecithin                   | 63.5 |
| IC | P* | 370.1131 | 6.54  | [M+H] <sup>+</sup>     | C <sub>16</sub> H <sub>19</sub> NO <sub>9</sub>                 | 0.46  | 6.59E-28 | -                              | -    |
| IC | P* | 527.1550 | 12.71 | [M+H] <sup>+</sup>     | C <sub>27</sub> H <sub>26</sub> O <sub>11</sub>                 | -0.35 | 8.17E-31 | No fragment info               | -    |
| IC | P* | 493.1340 | 9.84  | [M+H] <sup>+</sup>     | C <sub>23</sub> H <sub>24</sub> O <sub>12</sub>                 | 0.02  | 1.56E-28 | No fragment info               | -    |
| IC | P* | 540.1900 | 8.31  | [M+H] <sup>+</sup>     | C <sub>27</sub> H <sub>30</sub> N <sub>3</sub> O <sub>7</sub> P | -0.5  | 4.23E-29 | No fragment info               | -    |
| IC | P* | 527.1537 | 13.05 | [M+H] <sup>+</sup> ,   | C <sub>27</sub> H <sub>26</sub> O <sub>11</sub>                 | 0.2   | 8.17E-31 | -                              | -    |
| IC | P  | 441.2022 | 10.95 | [M+H] <sup>+</sup>     | C <sub>24</sub> H <sub>28</sub> N <sub>2</sub> O <sub>6</sub>   | -0.31 | 3.60E-19 | No fragment info               | -    |
| IC | P  | 903.3771 | 10.97 | [M+H] <sup>+</sup>     | C <sub>49</sub> H <sub>58</sub> O <sub>16</sub>                 | 0.2   | 3.72E-24 | -                              | -    |
| IC | P  | 265.1547 | 6.83  | [M+H] <sup>+</sup>     | C <sub>14</sub> H <sub>20</sub> N <sub>2</sub> O <sub>3</sub>   | 0.04  | 1.10E-28 | Feruloyl putrescine            | 43.2 |
| IC | P  | 411.1914 | 10.84 | [M+H] <sup>+</sup>     | C <sub>23</sub> H <sub>26</sub> N <sub>2</sub> O <sub>5</sub>   | 0.1   | 3.60E-19 | No fragment info               | -    |
